# Supplementary material for: A Novel Detection Method of Breast Cancer through a Simple Panel of Biomarkers
Source: MDPI journal article supplement (doi:10.3390/ijms231911983), 2022-10-09
Supplement: s1 [file s1]

Table S1. Characteristics of benign breast disease

| ID                          | Diagnosis                                                                                        |
|-----------------------------|--------------------------------------------------------------------------------------------------|
| <b>1<sup>st</sup> Phase</b> |                                                                                                  |
| M39                         | Fibrocystic breast changes, simple adenosis and ductal hyperplasia                               |
| M41                         | Atypical ductal hyperplasia and multifocal fat necrosis                                          |
| M42                         | Benign lipochondromatous tumor of the breast                                                     |
| M51                         | Epithelial hyperplasia, sclerosing adenosis, fibrocystic breast changes, and apocrine metaplasia |
| M54                         | Fibrocystic breast changes and simple adenosis                                                   |
| M57                         | Encapsulated fat necrosis                                                                        |
| M71                         | Extensive fat necrosis, sclerosing adenosis, columnar cell hyperplasia                           |
| M74                         | Breast hamartoma                                                                                 |
| M75                         | Encapsulated fat necrosis                                                                        |
| M78                         | Atypical ductal hyperplasia focal                                                                |
| M79                         | Fibrocystic breast changes and ductal hyperplasia                                                |
| M91                         | Fibrocystic breast changes, ductal ectasia and fibroadenoma                                      |
| M105                        | Fibrocystic breast changes                                                                       |
| M109                        | Fibrocystic breast changes, ductal hyperplasia and sclerosing adenosis                           |
| M113                        | Benign phyllodes tumor and ductal hyperplasia                                                    |
| M115                        | Columnar alterations with apical secretion, fibrocystic breast changes, and microcalcifications  |
| M116                        | Fibroadenoma                                                                                     |
| M118                        | Fibrocystic breast changes and ductal hyperplasia                                                |
| M171                        | Ductal ectasia and atypical ductal hyperplasia                                                   |
| M175                        | Ductal ectasia                                                                                   |
| M185                        | Fibroadenoma and fibrocystic breast changes                                                      |
| M187                        | Fibroadenoma                                                                                     |
| M198                        | Microcalcification, flat epithelial atypia, and fibrocystic breast changes                       |
| M202                        | Fibrocystic breast changes and ductal ectasia                                                    |
| M210                        | Giant Juvenile Fibroadenoma                                                                      |
| <b>2<sup>nd</sup> Phase</b> |                                                                                                  |
| CMP12                       | Fibrocystic breast changes and apocrine metaplasia                                               |
| CMP20                       | Benign papillary lesions and chronic inflammation                                                |
| CMP23                       | Benign papillary lesions, ductal ectasia, and fibrocystic breast changes                         |
| CMP24                       | Pericanalicular fibroadenoma associated with stromal hyperplasia                                 |
| CMP25                       | Granulomatous mastitis                                                                           |
| CMP28                       | Ductal hyperplasia and benign papillary lesions                                                  |

Table S2. Frequency of tumor staging in BC without CT and BC with CT groups

| Tumor Stage | 1 <sup>st</sup> Phase |      |                   |      | 2 <sup>nd</sup> Phase |      |                  |      |
|-------------|-----------------------|------|-------------------|------|-----------------------|------|------------------|------|
|             | BC without CT (n=49)  |      | BC with CT (n=13) |      | BC without CT (n=6)   |      | BC with CT (n=5) |      |
|             | n                     | %    | n                 | %    | n                     | %    | n                | %    |
| 0           | 9                     | 18.4 | 1                 | 7.7  | 0                     | 0.0  | 0                | 0.0  |
| IA          | 6                     | 12.2 | 4                 | 30.8 | 0                     | 0.0  | 0                | 0.0  |
| IB          | 0                     | 0.0  | 0                 | 0.0  | 0                     | 0.0  | 0                | 0.0  |
| IIA         | 12                    | 24.5 | 3                 | 23.1 | 3                     | 50.0 | 2                | 40.0 |
| IIB         | 7                     | 14.3 | 1                 | 7.7  | 3                     | 50.0 | 1                | 20.0 |
| IIIA        | 5                     | 10.2 | 2                 | 15.4 | 0                     | 0.0  | 1                | 20.0 |
| IIIB        | 0                     | 0.0  | 0                 | 0.0  | 0                     | 0.0  | 0                | 0.0  |
| IIIC        | 2                     | 4.10 | 0                 | 0.0  | 0                     | 0.0  | 0                | 0.0  |
| NR          | 8                     | 16.3 | 2                 | 15.4 | 0                     | 0.0  | 1                | 20.0 |
